# Supplementary material for: Proteomic Screens for Suppressors of Anoikis Identify IL1RAP as a Promising Surface Target in Ewing Sarcoma
Source: Oxford University Press journal article supplement (doi:10.1158/2159-8290.cd-20-1690), 2021-05-21
Supplement: cd-20-1690_supplementary_table_s3_suppst3.xlsx [file cd-20-1690_supplementary_table_s3_suppst3.xlsx]

## Sheet: Antibodies
Antibody	Clone	Type	Peptide Region	Source	Catalog #
4-HNE	polyclonal	Rabbit polyclonal IgG	HNE conjugated to a blue carrier	Abcam	ab46545
ATF4	D4B8	Rabbit monoclonal IgG	Residues near the C-terminus	Cell Signaling	11815
β-Actin	D6A8	Rabbit monoclonal IgG	Residues near the N-terminus	Cell Signaling	8457
β-Tubulin	D2N5G	Rabbit monoclonal IgG	Residues near the N-terminus	Cell Signaling	15115
Caspase-3	polyclonal	Rabbit polyclonal IgG	Residues surrounding the cleavage site	Cell Signaling	9662
CD14-FITC	MoP9	Mouse monoclonal IgG2b	Human monocytes	STEMCELL	60124FI
CD15-PECy7	HI98	Mouse IgM, κ	Human Mononuclear Cells	BD Pharmigen	560827
CD19-APC-ef780	SJ25C1	Mouse / IgG1, κ	N/A	Invitrogen	47-0198-42
CD3-SB600	OKT3	Mouse / IgG2a, κ	N/A	Invitrogen	63-0037-42
CD32	IV.3	Mouse monoclonal IgG2b	K-562 leukemia cell line	STEMCELL	60012
CD33-PECF594	WM53	Mouse (BALB/c) IgG1, κ	Acute Myeloid Leukemia Blasts	BD Horizon	562492
CD34-AF647	581	Mouse IgG1, κ	N/A	Biolegend	343508
CD98	polyclonal	Rabbit polyclonal IgG	Full-length CD98	Novus	H00006520-D01P
CD98	D5U4G	Rabbit monoclonal IgG	Residues surrounding Ala629	Cell Signaling	94274
CD99	3B2/TA8	Mouse monoclonal IgG2, κ	N/A	BioLegend	371302
CTH	4E1-1B7	Mouse monoclonal IgG1, κ	Full-length CTH with GST tag	Abnova	H00001491-M01
FLI1	polyclonal	Rabbit polyclonal IgG	aa 400 to the C-terminus	Abcam	ab15289
GRB2	81	Mouse monoclonal IgG1	aa1-217	BD	610111
H3K27ac	polyclonal	Rabbit polyclonal IgG	Residues surrounding acetyl-lysine 27	Active Motif	39133
HA tag	C29F4	Rabbit monoclonal IgG	Synthetic peptide YPYDVPDYA	Cell Signaling	3724
IL1RAP	89412	Mouse monoclonal IgG1	Ser21-Glu359	R&D	MAB676
IL1RAP	polyclonal	Goat polyclonal IgG	Ser21-Glu359	R&D	AF676
IL1RAP, APC-conjugated	89412	Mouse monoclonal IgG1	Ser21-Glu359	R&D	FAB676A
IL1RAP, PE-conjugated	89412	Mouse monoclonal IgG1	Ser21-Glu359	R&D	FAB676P
LAMP1	D2D11	Rabbit monoclonal IgG	N/A	Cell Signaling	9091
LAT1	polyclonal	Rabbit monoclonal IgG	Residues near the N-terminus	Cell Signaling	5347
LAT2	5A9	Mouse monoclonal IgG1	Full-length protein	GeneTex	GTX83618
NTRK3	C-15	Rabbit polyclonal IgG	Residues near the C-terminus	Santa Cruz	sc-139
p300	D2X6N	Rabbit monoclonal IgG	Residues surrounding Leu733	Cell Signaling	54062
PARP	polyclonal	Rabbit polyclonal IgG	Residues surrounding the cleavage site	Cell Signaling	9542
SMARCC1/BAF155	D7F8S	Rabbit monoclonal IgG	Residues surrounding Gly975	Cell Signaling	11956
Vinculin	E1E9V	Rabbit monoclonal IgG	Residues near the N-terminus	Cell Signaling	13901
xCT	polyclonal	Rabbit polyclonal IgG	aa1-50	Novus	NB300-317
xCT	D2M7A	Rabbit monoclonal IgG	Residues surrounding Ala224	Cell Signaling	12691
ChIP Antibodies
FLI1	polyclonal	Rabbit polyclonal IgG	aa 400 to the C-terminus	Abcam	ab15289
H3K27ac	polyclonal	Rabbit polyclonal IgG	Residues surrounding acetyl-lysine 27	Active Motif	39133
p300	D2X6N	Rabbit monoclonal IgG	Residues surrounding Leu733	Cell Signaling	54062
SMARCC1/BAF155	D7F8S	Rabbit monoclonal IgG	Residues surrounding Gly975	Cell Signaling	11956
