# Supplementary material for: Proteomic Screens for Suppressors of Anoikis Identify IL1RAP as a Promising Surface Target in Ewing Sarcoma
Source: Oxford University Press journal article supplement (doi:10.1158/2159-8290.cd-20-1690), 2021-05-21
Supplement: cd-20-1690_supplementary_table_s4_suppst4.xlsx [file cd-20-1690_supplementary_table_s4_suppst4.xlsx]

## Sheet: qPCR and ChIP-qPCR primers
qPCR primers	Forward	Reverse
Il1rap (mouse)	AAGGTGGTGGGCTCACCAA	CCAGTTCCTCTCCTGGTTCTT
Gnai2 (mouse)	CAGCCGCTTACTACCTGAATGA	CATCAAACATCTTGAAGTGTAAGT
Cpe (mouse)	TGCTGGCGCTGTGTGCCGCGCT	GCTCGCCGGGCTGCGATGCGG
Capg (mouse)	CCTGGGTCAGAACATCTTTGC	GCCCAGAACCTGAATCATCTC
Actb (mouse)	GACAGGATGCAGAAGGAGAT	TTGCTGATCCACATCTGCTG
Gapdh (mouse)	TGCACCACCAACTGCTTAG	GGATGCAGGGATGATGTTT
Myo1b (mouse)	ACCAGCAAGGTCTGGCGTG	CTAGTTGGAATAATGTCCGTGG
Nrp2 (mouse)	GTGACTGGACAGACTCAAAGC	CAAATCTTTGTCATCCTCAAAG
Peg3 (mouse)	CTCGATCCCAGGATGCCGAGT	AGCTGGACTCCCAGCGAGAGCA
Sh3kbp1 (mouse)	CAGGACAAAGACCAAGGATTA	CGATGCAGTCCTTATTGATGA
IL1RAP (human)	AAGGTAGTAGGCTCTCCAAA	GTAGCTCCTCTCCTGGTTCTT
EP300 (human)	GGCCTGCTGGATTCGTCTGT	GATGGCAACCTTTTAGCAGA
SLC7A11 (human)	GCGTGGGCATGTCTCTGAC	GCTGGTAATGGACCAAAGACTTC
CTH (human)	TACATGAATGGCCACAGTGA	GCTCCAAGAGAGTTTTGCAAG
CBS (human)	ATCCTAGACCAGTACCGCAA	GTCCAGCTTCCCATCACACT
ACTB (human)	AGAGCTACGAGCTGCCTGAC	AGCACTGTGTTGGCGTACAG
HMGB2 (human)	ACACCCGGACTCTTCCGTCA	TCATAGCGAGCTTTGTCACT
EWS-FLI1 (human)	TAGTTACCCACCCCAAACTGGAT	GGGCCGTTGCTCTGTATTCTTA
GAPDH (human)	GAAGGTGAAGGTCGGAGTCA	TTGAGGTCAATGAAGGGGTC
BAF155 (human)	ACGACATCAGGGAACATTTA	CAACCATTCTTCATCGTCTT
PGK1 (human)	TGGGAACAAGGTTAAAGCCGA	TACCATGGAGCTGTGGGCTCT
ITGA2 (human)	CAAGCCTTAAGTGAAAGCCAAG	GTTGGTAGATCTTGTTAAGTG
ChIP PCR primers	Forward	Reverse
IL1RAP-Site #1	TCCCAATTACAGAGTGAGA	CAAACCCAGCCTGATTCCGA
IL1RAP-Site #2	CATTCAGTACAGCAGAAAACT	AGAAGCTCCTCATGTACCAA
SOX2	GAAGTGCACCCTATGCCAGT	TCCTCTGTGGGGGTTATCCA
